# Supplementary material for: The SH3 regulatory domain of the hematopoietic cell kinase Hck binds ELMO via its polyproline motif
Source: PubMed Central journal article supplement — FEBS Open Bio. 2015 Feb 4;5:99–106. doi: 10.1016/j.fob.2015.01.009 (PMC4338372; doi:10.1016/j.fob.2015.01.009), 2015-02-04

**Figure S1: Western-blot analysis of the cellular extracts of HEK293T cells transfected with ELMO1 deletion mutants or SH3<sub>Hck</sub>.**

Lysates of HEK293T cells transfected (control well, left) or cotransfected (ELMO wells) with SNAP-ELMO and CLIP-SH3 constructs, were analyzed by anti-SNAP antibody immunolabeling after polyacrylamide gel electrophoresis and transfer. SNAP antibodies (1/500) reveal both CLIP and SNAP tagged constructs expressed in the distinct HEK293T cell lysates tested (arrows). The cell lysates show that the expressed proteins and domains are present in the extracts at comparable expression levels.

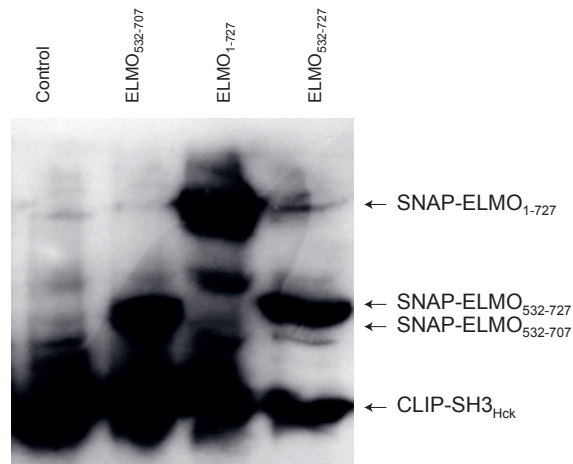

Supplement: mmc1.pdf [file mmc1.pdf]
