# Supplementary material for: The SH3 regulatory domain of the hematopoietic cell kinase Hck binds ELMO via its polyproline motif
Source: PubMed Central journal article supplement — FEBS Open Bio. 2015 Feb 4;5:99–106. doi: 10.1016/j.fob.2015.01.009 (PMC4338372; doi:10.1016/j.fob.2015.01.009), 2015-02-04
Supplement: mmc2.pdf [file mmc2.pdf]

**Table S1: Non-linear least square fitting with Monte Carlo error of the chemical shifts mapping variations.**

Calculated constants and errors from the chemical shifts mapping variations of the 5 most representative residues during titration of the Hck<sub>SH3</sub> domain with increasing peptide concentrations of the polyproline motif of ELMO under its phosphorylated (ELMO<sub>(p)707-727</sub>) or non-phosphorylated form (ELMO<sub>707-727</sub>).

|                            |                               |               |                |                |                |               |
|----------------------------|-------------------------------|---------------|----------------|----------------|----------------|---------------|
|                            | <b>D95</b>                    | <b>S110</b>   | <b>E112</b>    | <b>W113sc</b>  | <b>S129</b>    |               |
| ELMO <sub>707-727</sub>    | <b>Kd</b>                     | 1.7 ± 0.18 mM | 1.97 ± 0.39 mM | 1.84 ± 0.14 mM | 1.73 ± 0.13 mM | 1.56 ± 0.1 mM |
|                            | <b>Δδ<sub>max</sub> [ppm]</b> | 0.11          | 0.18           | 0.19           | 0.35           | 0.13          |
|                            | <b>R</b>                      | 0.995         | 0,981          | 0.997          | 0.997          | 0.998         |
|                            | <b>χ<sup>2</sup></b>          | 5E-05         | 8E-04          | 1E-04          | 5E-04          | 8E-05         |
| ELMO <sub>(p)707-727</sub> | <b>Kd</b>                     | 7.9 ± 1.7 mM  | 5.08 ± 0.18 mM | 4.68 ± 0.29 mM | 5.18 ± 0.36 mM | 4.55 ± 0.3 mM |
|                            | <b>Δδ<sub>max</sub> [ppm]</b> | 0.18          | 0.21           | 0.25           | 0.43           | 0.16          |
|                            | <b>R</b>                      | 0.994         | 0,999          | 0.999          | 0.999          | 0.999         |
|                            | <b>χ<sup>2</sup></b>          | 1E-04         | 1E-05          | 0.5E-04        | 1.5E-04        | 2.5E-05       |
